# Supplementary material for: Inverted perovskite solar cells based on potassium salt-modified NiOX hole transport layers
Source: Royal Society of Chemistry journal article supplement (doi:10.1039/d0qm01064b), 2021-01-01
Supplement: d0qm01064b1.pdf [file d0qm01064b1.pdf]

## Electronic Supplementary Information

### **Inverted perovskite solar cells based on potassium salts-modified NiO<sub>x</sub> hole transport layers**

Xinyi Liu,<sup>a</sup> Hong Wei Qiao,<sup>a</sup> Mengjiong Chen,<sup>a</sup> Bing Ge,<sup>a</sup> Shuang Yang,<sup>\*,a</sup> Yu Hou,<sup>\*,a</sup> and Hua Gui Yang<sup>a</sup>

<sup>a</sup> *Key Laboratory for Ultrafine Materials of Ministry of Education, Shanghai Engineering Research Center of Hierarchical Nanomaterials, School of Materials Science and Engineering, East China University of Science and Technology, Shanghai 200237, China*

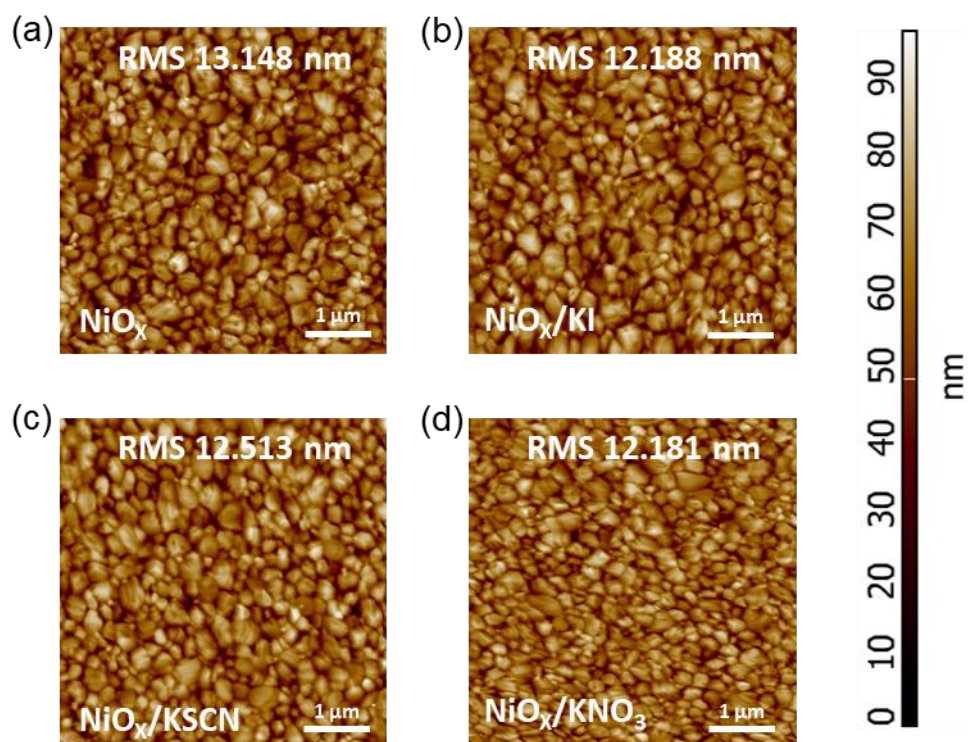

**Figure S1.** AFM images showing RMS roughness of the perovskite films based on (a) pristine and (b) KI, (c) KSCN, (d)  $\text{KNO}_3$  treated HTLs.

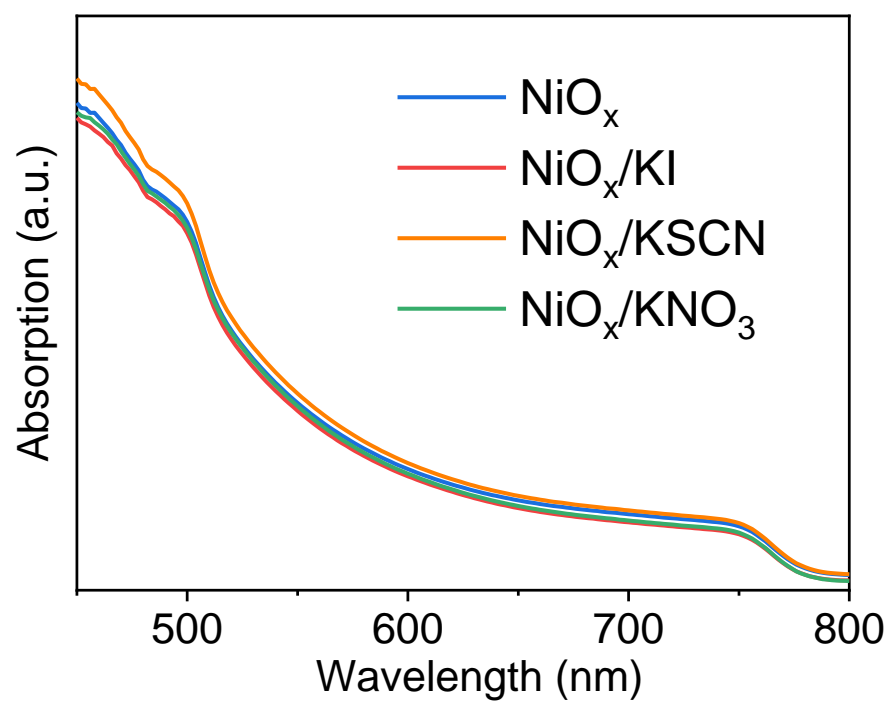

**Figure S2.** Absorption spectra of the perovskite coated different NiO<sub>x</sub> films.

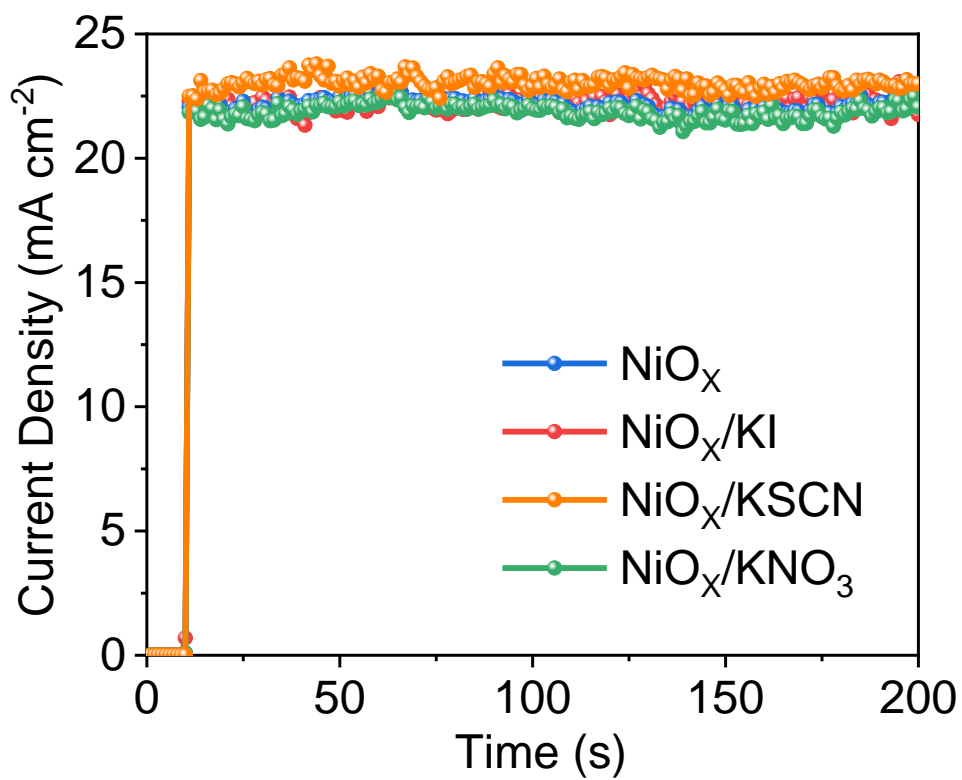

**Figure S3.** The photocurrent density of the device with and without KI modification measured at a fixed maximum power point voltage as a function of time.

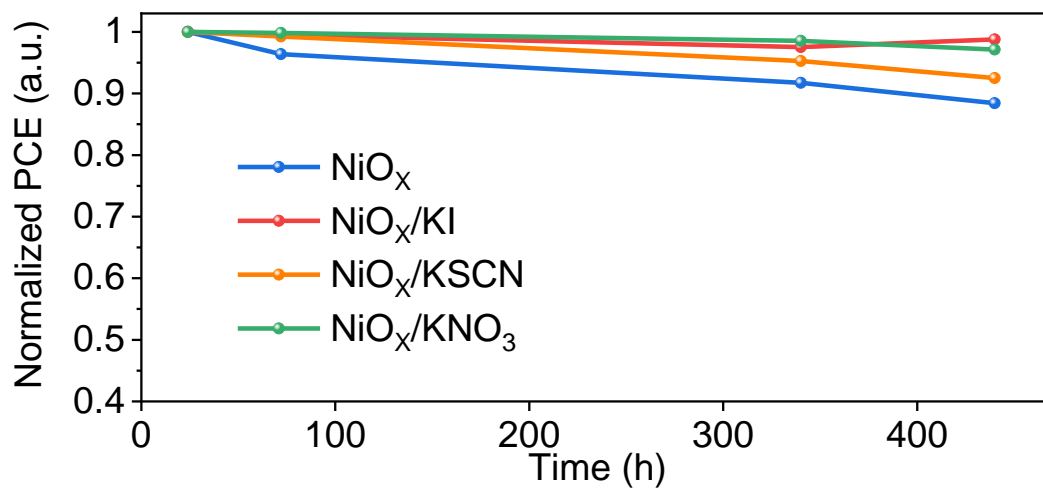

**Figure S4.** Results of humidity stability tests on the unencapsulated control and treated devices under 15% relative humidity at room temperature.

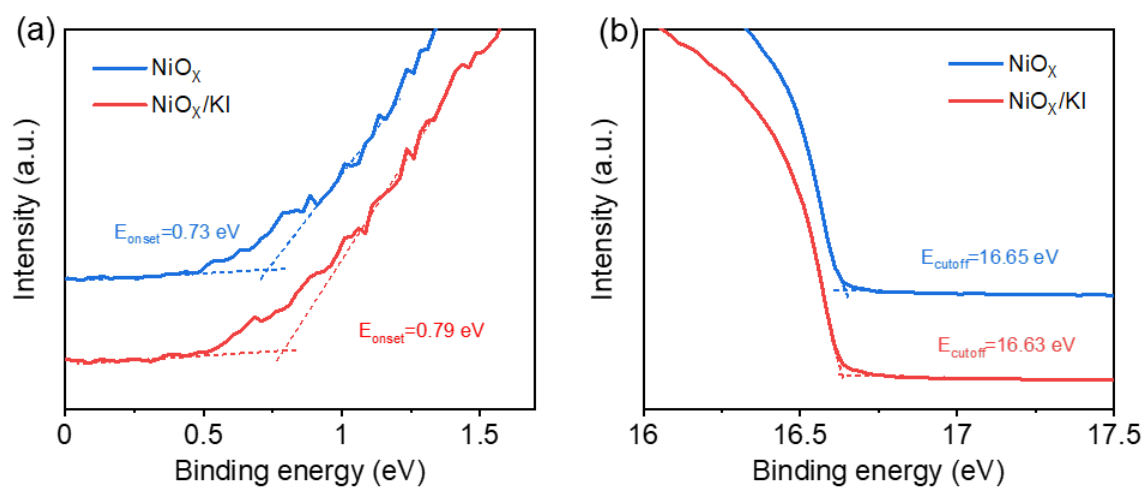

**Figure S5.** The UPS spectra in the onset and the cutoff energy regions of the surface measurement for the NiO<sub>x</sub> films with and without KI treatment.
